# Supplementary material for: Functional predication of differentially expressed circRNAs/lncRNAs in the prefrontal cortex of Nrf2-knockout mice
Source: PubMed Central journal article supplement (PMC8034947; doi:10.18632/aging.202688), 2021-03-10
Supplement: aging-13-202688-s002.pdf [file aging-13-202688-s002.pdf]

## SUPPLEMENTARY TABLE

**Supplementary Table 1. DEcircRNAs and DElncRNAs with coding potential.**

| <b>Transcript ID</b> | <b>Type</b> | <b>index</b> | <b>score</b> | <b>start</b> | <b>end</b> | <b>length</b> |
|----------------------|-------------|--------------|--------------|--------------|------------|---------------|
| cicRNA.8466          | circRNA     | coding       | 0.495        | 0            | 147        | 300           |
| cicRNA.22210         | circRNA     | coding       | 0.492        | 0            | 144        | 300           |
| mmu_circ_0011393     | circRNA     | coding       | 0.462        | 0            | 297        | 452           |
| mmu_circ_0003404     | circRNA     | coding       | 0.46         | 0            | 198        | 351           |
| mmu_circ_0000294     | circRNA     | coding       | 0.453        | 0            | 186        | 341           |
| cicRNA.9167          | circRNA     | coding       | 0.405        | 0            | 144        | 300           |
| cicRNA.26879         | circRNA     | coding       | 0.398        | 0            | 126        | 300           |
| mmu_circ_0010317     | circRNA     | coding       | 0.391        | 0            | 186        | 5914          |
| cicRNA.21900         | circRNA     | coding       | 0.387        | 0            | 105        | 300           |
| mmu_circ_0006643     | circRNA     | coding       | 0.365        | 351          | 732        | 887           |
| cicRNA.9806          | circRNA     | coding       | 0.351        | 0            | 147        | 300           |
| mmu_circ_0007747     | circRNA     | coding       | 0.35         | 0            | 153        | 393           |
| cicRNA.22949         | circRNA     | coding       | 0.341        | 0            | 147        | 300           |
| cicRNA.14293         | circRNA     | coding       | 0.31         | 0            | 147        | 300           |
| mmu_circ_0000233     | circRNA     | coding       | 0.299        | 0            | 204        | 360           |
| mmu_circ_0005741     | circRNA     | coding       | 0.284        | 0            | 447        | 602           |
| cicRNA.13720         | circRNA     | coding       | 0.283        | 0            | 144        | 300           |
| mmu_circ_0002377     | circRNA     | coding       | 0.283        | 0            | 996        | 1150          |
| cicRNA.1182          | circRNA     | coding       | 0.281        | 0            | 144        | 300           |
| cicRNA.24048         | circRNA     | coding       | 0.261        | 0            | 147        | 300           |
| mmu_circ_0006760     | circRNA     | coding       | 0.255        | 0            | 327        | 481           |
| cicRNA.9803          | circRNA     | coding       | 0.243        | 0            | 147        | 300           |
| mmu_circ_0003323     | circRNA     | coding       | 0.242        | 147          | 957        | 1111          |
| mmu_circ_0007093     | circRNA     | coding       | 0.224        | 0            | 585        | 786           |
| mmu_circ_0006074     | circRNA     | coding       | 0.221        | 0            | 189        | 344           |
| cicRNA.23286         | circRNA     | coding       | 0.21         | 0            | 144        | 300           |
| cicRNA.6161          | circRNA     | coding       | 0.203        | 0            | 111        | 300           |
| cicRNA.5874          | circRNA     | coding       | 0.202        | 0            | 135        | 300           |
| mmu_circ_0006597     | circRNA     | coding       | 0.19         | 0            | 3549       | 3704          |
| cicRNA.8829          | circRNA     | coding       | 0.163        | 0            | 144        | 300           |
| mmu_circ_0008393     | circRNA     | coding       | 0.16         | 0            | 2178       | 2677          |
| mmu_circ_0010608     | circRNA     | coding       | 0.16         | 0            | 252        | 405           |
| mmu_circ_0010196     | circRNA     | coding       | 0.146        | 3057         | 3747       | 3901          |
| mmu_circ_0004041     | circRNA     | coding       | 0.144        | 0            | 1299       | 1453          |
| mmu_circ_0010157     | circRNA     | coding       | 0.142        | 0            | 369        | 523           |
| mmu_circ_0012936     | circRNA     | coding       | 0.134        | 0            | 783        | 936           |
| cicRNA.2029          | circRNA     | coding       | 0.108        | 0            | 144        | 300           |
| mmu_circ_0010156     | circRNA     | coding       | 0.106        | 189          | 1284       | 1438          |
| cicRNA.17816         | circRNA     | coding       | 0.09         | 0            | 144        | 300           |
| cicRNA.9831          | circRNA     | coding       | 0.058        | 0            | 147        | 300           |
| cicRNA.2059          | circRNA     | coding       | 0.05         | 21           | 144        | 300           |
| cicRNA.16687         | circRNA     | coding       | 0.026        | 0            | 147        | 300           |
| mmu_circ_0015035     | circRNA     | coding       | 0.007        | 1752         | 1896       | 2051          |
| cicRNA.3545          | circRNA     | coding       | 0.001        | 0            | 129        | 300           |
| NR_003634            | lncRNA      | coding       | 0.599        | 0            | 723        | 941           |
| ENSMUST00000193778   | lncRNA      | coding       | 0.269        | 0            | 270        | 2174          |

|                    |        |        |       |     |      |      |
|--------------------|--------|--------|-------|-----|------|------|
| ENSMUST00000207903 | lncRNA | coding | 0.126 | 0   | 879  | 1038 |
| ENSMUST00000077153 | lncRNA | coding | 0.079 | 129 | 1191 | 1983 |
| ENSMUST00000190980 | lncRNA | coding | 0.077 | 0   | 150  | 534  |
| NR_015490          | lncRNA | coding | 0.076 | 0   | 246  | 763  |
| ENSMUST00000212669 | lncRNA | coding | 0.059 | 825 | 1137 | 2443 |

---
