# Supplementary material for: Functional predication of differentially expressed circRNAs/lncRNAs in the prefrontal cortex of Nrf2-knockout mice
Source: publisher site journal article supplement (doi:10.18632/aging.202688), 2021-03-10
Supplement: Supplementary file [file aging-v13i6-202688-supplementary-material-SD1.pdf]

**SUPPLEMENTARY FIGURE**

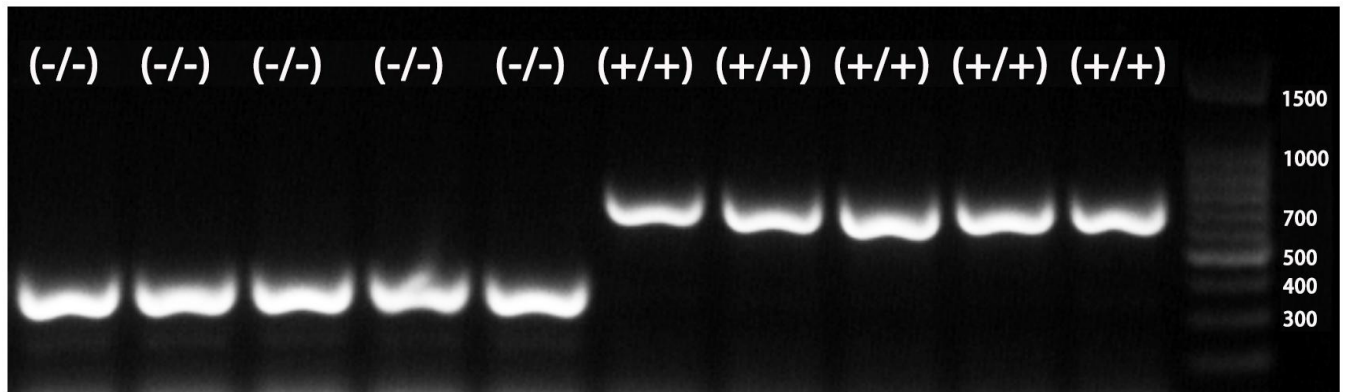

**Supplementary Figure 1. Agarose gel electrophoresis for Nrf2 genotype identification.** A single band around 400 base pairs identifies Nrf2 (-/-) mice, and a single band around 700 base pairs identifies Nrf2 (+/+) mice.
