# Supplementary material for: Functional predication of differentially expressed circRNAs/lncRNAs in the prefrontal cortex of Nrf2-knockout mice
Source: Aging (Albany NY). 2021 Mar 10;13(6):8797–816. doi: 10.18632/aging.202688 (PMC8034947; doi:10.18632/aging.202688)
Supplement: Supplementary Table 2 [file aging-13-202688-s003.xls]

## Sheet: Sheet1
Supplementary Table 2. Comparison of expression levels between DEcircRNAs/DElncRNAs and corresponding mRNAs.
Transcript ID	Type	Hostgene	Correlation	p-value
cicRNA.12626	circRNA	Hba-a1	0.996876	1.46192e-05
cicRNA.12625	circRNA	Hba-a1	0.995114	3.57459e-05
cicRNA.24926	circRNA	Pdk1	0.985741	0.000303511
cicRNA.24872	circRNA	Nfe2l2	0.985588	0.000310075
cicRNA.16195	circRNA	Aox1	0.982846	0.000438847
cicRNA.24923	circRNA	Pdk1	0.9812	0.000526845
mmu_circ_0010317	circRNA	Syt6	0.9809	0.000543738
cicRNA.5685	circRNA	Fam49b	0.970928	0.0012555
cicRNA.14446	circRNA	Ascc3	0.968387	0.00148324
cicRNA.21676	circRNA	Gtf2ird1	0.968196	0.00150113
cicRNA.24924	circRNA	Pdk1	0.968169	0.00150373
cicRNA.9094	circRNA	Ryr2	-0.965148	0.0018008
cicRNA.9803	circRNA	Nin	0.963481	0.00197616
cicRNA.14175	circRNA	Ank3	-0.950369	0.00363371
mmu_circ_0002663	circRNA	Plekhm1	-0.949219	0.00380258
cicRNA.20044	circRNA	Rbpms	-0.947568	0.00405167
cicRNA.24925	circRNA	Pdk1	0.944304	0.00456667
cicRNA.4018	circRNA	Pdia5	0.943817	0.00464608
cicRNA.9805	circRNA	Nin	0.942776	0.00481824
mmu_circ_0002377	circRNA	Ank3	-0.940074	0.00527913
cicRNA.16687	circRNA	Pkhd1	-0.934977	0.00620452
cicRNA.19908	circRNA	Large1	0.934557	0.00628395
cicRNA.15827	circRNA	Prkag3	0.929166	0.00734841
mmu_circ_0003323	circRNA	Wscd1	0.927264	0.00774345
mmu_circ_0008393	circRNA	Pou2f1	-0.925442	0.00813103
cicRNA.9167	circRNA	Zswim6	0.924866	0.0082557
cicRNA.5598	circRNA	Sla	0.923962	0.00845288
cicRNA.4368	circRNA	Eif2b5	-0.923872	0.00847255
cicRNA.10497	circRNA	Mta1	-0.915462	0.0104179
cicRNA.2981	circRNA	Fkbp5	0.906432	0.0127228
cicRNA.6936	circRNA	Zmym2	0.902	0.0139355
cicRNA.15355	circRNA	Tmtc2	0.901883	0.0139682
cicRNA.6752	circRNA	Cdca2	-0.899904	0.0145275
mmu_circ_0006805	circRNA	Daam2	0.898387	0.0149633
cicRNA.19428	circRNA	Kirrel3	0.889627	0.0176009
mmu_circ_0007013	circRNA	Ltbp1	0.888705	0.0178905
cicRNA.22003	circRNA	Wdfy3	-0.888135	0.0180707
cicRNA.19092	circRNA	Anxa2	0.885371	0.0189567
cicRNA.6975	circRNA	Myh6	0.883747	0.0194866
mmu_circ_0010608	circRNA	Fndc3b	0.883657	0.0195162
cicRNA.1866	circRNA	Plekhh2	0.879789	0.0208075
cicRNA.4957	circRNA	Lmf2	0.877804	0.0214854
mmu_circ_0006643	circRNA	Grm4	0.875679	0.0222229
cicRNA.1182	circRNA	Svil	-0.875177	0.0223987
cicRNA.8236	circRNA	Adamts16	-0.873766	0.0228967
cicRNA.4014	circRNA	Dirc2	-0.872695	0.0232782
cicRNA.14169	circRNA	Ank3	-0.871551	0.0236891
cicRNA.8988	circRNA	Nnt	0.86966	0.0243756
cicRNA.12299	circRNA	Hspa4	-0.869423	0.0244623
cicRNA.1521	circRNA	Pik3c3	0.868667	0.02474
mmu_circ_0002459	circRNA	Efna2	-0.868469	0.024813
cicRNA.19573	circRNA	Ulk4	0.866783	0.0254381
mmu_circ_0008950	circRNA	Abcb6	-0.860403	0.0278708
cicRNA.6011	circRNA	Vps13b	0.851228	0.0315534
cicRNA.9806	circRNA	Nin	0.849902	0.0321033
mmu_circ_0000233	circRNA	Tns3	0.848075	0.0328686
mmu_circ_0010196	circRNA	Ccdc141	0.844662	0.0343209
cicRNA.538	circRNA	Ms4a6c	0.843745	0.0347158
cicRNA.5102	circRNA	Arfgap3	-0.843537	0.0348057
cicRNA.10112	circRNA	Dnmt3a	0.835698	0.0382752
cicRNA.22949	circRNA	Kdm4a	-0.83519	0.0385053
cicRNA.27349	circRNA	Thbs1	0.834395	0.0388668
cicRNA.8466	circRNA	Gadd45g	0.83393	0.0390788
cicRNA.25812	circRNA	Vav2	0.830688	0.0405733
mmu_circ_0000294	circRNA	Slc43a2	0.82988	0.0409493
cicRNA.13733	circRNA	Utp20	0.828112	0.041779
cicRNA.16265	circRNA	Hecw2	0.827308	0.0421587
cicRNA.6723	circRNA	Bin3	0.826912	0.0423462
cicRNA.24788	circRNA	Ttn	-0.822712	0.0443604
cicRNA.6010	circRNA	Vps13b	0.821877	0.044766
cicRNA.14293	circRNA	Aifm2	0.81986	0.0457529
cicRNA.14313	circRNA	Sgpl1	0.814692	0.048327
cicRNA.17683	circRNA	Nav1	0.814487	0.0484304
cicRNA.27704	circRNA	Pola2	-0.813704	0.0488263
NR_110608	lncRNA	FILIP1	-0.943171	0.000439488
NR_048570	lncRNA	EXTL2	0.942199	0.000462094
NR_036640	lncRNA	YIPF1	0.938874	0.000545131
NR_027398	lncRNA	GFOD2	0.935618	0.000635376
NR_104128	lncRNA	IDS	-0.922973	0.00107753
NR_123740	lncRNA	RIMKLB	0.914434	0.00146742
NR_104463	lncRNA	C6orf201	-0.901002	0.00224906
NR_038131	lncRNA	UNK	0.898447	0.0024229
NR_045674	lncRNA	CLIC5	0.885408	0.00344597
NR_125361	lncRNA	MORN1	0.879073	0.00402962
NR_109844	lncRNA	CLIP4	0.878286	0.00410625
NR_034072	lncRNA	SARS	0.877797	0.00415441
NR_047510	lncRNA	N6AMT1	-0.866629	0.00535354
NR_104600	lncRNA	CBWD5	0.861369	0.00598743
NR_110644	lncRNA	ERICH2	0.860785	0.00606053
NR_103512	lncRNA	ARL6IP4	0.853868	0.00697143
NR_028468	lncRNA	ATXN3	0.848224	0.00777595
NR_073488	lncRNA	HINT1	-0.839915	0.0090643
NR_103458	lncRNA	KCNN2	-0.838706	0.00926236
NR_045864	lncRNA	ARMCX4	0.838599	0.00928009
NR_110864	lncRNA	NBPF11	-0.831745	0.0104561
NR_073518	lncRNA	SEC11A	0.825659	0.0115758
NR_074083	lncRNA	TMEM231	0.825377	0.0116295
NR_126504	lncRNA	C20orf197	-0.816666	0.0133646
NR_045673	lncRNA	CLIC5	-0.81302	0.0141367
NR_047665	lncRNA	EPS15L1	0.812697	0.0142064
NR_073608	lncRNA	FASTKD3	-0.811225	0.0145268
NR_130943	lncRNA	DYNLRB2	0.807273	0.0154093
NR_040016	lncRNA	TMEM50B	-0.800355	0.017034
NR_026886	lncRNA	LRTOMT	0.799128	0.0173328
NR_120592	lncRNA	PRSS23	0.791385	0.0192944
ENST00000416411.1	lncRNA	C22orf34	0.791143	0.0193577
NR_038261	lncRNA	HIVEP3	0.784641	0.0211111
NR_104595	lncRNA	SPATA13	-0.779511	0.0225618
NR_123738	lncRNA	USH1C	0.779089	0.0226838
NR_073389	lncRNA	ZNF138	0.77602	0.0235835
NR_110912	lncRNA	KCNC3	-0.774829	0.0239384
NR_047684	lncRNA	TMEM249	0.767839	0.0260888
NR_130928	lncRNA	MXRA7	0.757591	0.0294507
NR_102308	lncRNA	CACNG6	0.75366	0.0308073
NR_038322	lncRNA	MAP3K13	0.748706	0.0325711
NR_073560	lncRNA	STXBP2	-0.744363	0.0341668
NR_046292	lncRNA	MSTO1	0.743959	0.0343175
NR_037607	lncRNA	UCHL5	0.742173	0.0349894
NR_110232	lncRNA	ACSF2	-0.7405	0.0356256
NR_104475	lncRNA	DUSP22	0.736377	0.0372242
NR_037659	lncRNA	POC1B	0.735462	0.0375847
NR_110523	lncRNA	C22orf34	-0.733418	0.0383978
NR_023313	lncRNA	CIRBP	0.726089	0.0414005
NR_048535	lncRNA	WDR4	0.724664	0.0420005
NR_027410	lncRNA	GOLGA8B	-0.721108	0.0435202
NR_130790	lncRNA	MIEF1	0.720415	0.0438203
NR_045607	lncRNA	UXS1	-0.712295	0.0474289
NR_047515	lncRNA	SLC9B1	0.711629	0.0477323
NR_027649	lncRNA	C15orf40	0.706961	0.0498938
